# Supplementary material
Source: publisher site journal article supplement (https://study.sagepub.com/system/files/appendix_0.pdf)
Supplement: Supplementary file 1 [file appendix_0.pdf]

# APPENDIX

---

## An Annotated Bibliography of Qualitative Research Methods Resources

This appendix includes a selected listing of recommended titles for learning more about qualitative inquiry. It is limited to English-language works and primarily monographs. We cannot possibly include everything in print and online; we provide only a representative sample of resources.

### REFERENCE TEXTS FOR QUALITATIVE INQUIRY

---

Bothamley, J. (1993). *Dictionary of theories*. London: Gale Research International. Reference guide to theories from all disciplines, including the arts, sociology, psychology, history, and the natural sciences—useful for terminology reference, definitions, and associated names.

Given, L. M. (Ed.). (2008). *The SAGE encyclopedia of qualitative research methods*. Thousand Oaks, CA: Sage. Superior reference for summaries of philosophical and methodological principles of qualitative inquiry.

Schwandt, T. A. (2015). *Dictionary of qualitative inquiry* (4th ed.). Thousand Oaks, CA: Sage. Extended dictionary of terms in the field; many entries include origins of the terms, applications across various social science fields, and references for additional investigation.

### QUANTITATIVE AND QUALITATIVE RESEARCH DESIGN (GENERAL TEXTBOOKS)

---

Creswell, J. W., & Creswell, J. D. (2018). *Research design: Qualitative, quantitative, and mixed methods approaches* (5th ed.). Thousand Oaks, CA: Sage. Excellent overview of all three paradigms for the beginning researcher.

Durdella, N. (2019). *Qualitative dissertation methodology: A guide for research design and methods*. Thousand Oaks, CA: Sage. Overview of designing and writing about qualitative approaches, specifically for dissertation content and format.

Leavy, P. (2017). *Research design: Quantitative, qualitative, mixed methods, arts-based, and community-based participatory research approaches*. New York: Guilford. Introductory overview of five methodologies for research approaches.

Mertens, D. M. (2015). *Research and evaluation in education and psychology* (4th ed.). Thousand Oaks, CA: Sage. Introductory text that surveys various approaches to research but focuses more on the quantitative approach; compares various paradigms (emancipatory, feminist, etc.) and offers detailed guidelines for research design or evaluation of research.

Wilkinson, D., & Birmingham, P. (2003). *Using research instruments: A guide for researchers*. London: Routledge. User-friendly introduction to techniques such as survey construction, interview questions, focus group facilitation, participant observation, content analysis, and so on.

## QUALITATIVE RESEARCH (GENERAL TEXTBOOKS)

---

Bhattacharya, K. (2017). *Fundamentals of qualitative research: A practical guide*. New York: Routledge. An activities-based introduction to key facets of inquiry. Provides questions and prompts for student participation and reflection.

Creswell, J. W. (2016). *30 essential skills for the qualitative researcher*. Thousand Oaks, CA: Sage. Thirty modules, ranging from research design to write-ups, are offered with practical guidance.

Creswell, J. W., & Poth, C. N. (2018). *Qualitative inquiry and research design: Choosing among five approaches* (4th ed.). Thousand Oaks, CA: Sage. Describes and compares the unique features of narrative research, phenomenology, grounded theory, ethnography, and case study research; includes article examples.

Gibson, W. J., & Brown, A. (2009). *Working with qualitative data*. London: Sage. An introductory overview with an emphasis on philosophical foundations of inquiry and data collection in various forms.

Glesne, C. (2016). *Becoming qualitative researchers: An introduction* (5th ed.). Boston: Pearson Education. Excellent overview and introductory text on the nature and process of qualitative research/ethnography.

Lofland, J., Snow, D. A., Anderson, L., & Lofland, L. H. (2006). *Analyzing social settings: A guide to qualitative observation and analysis* (4th ed.). Belmont, CA: Wadsworth. Highly systematic techniques for qualitative studies; a dense but comprehensive “how to” text.

Marshall, C., & Rossman, G. B. (2016). *Designing qualitative research* (6th ed.). Thousand Oaks, CA: Sage. Overview of considerations for the preparatory phases of qualitative studies; written for doctoral students; provides numerous illustrative vignettes.

Mason, J. (2002). *Qualitative researching* (2nd ed.). London: Sage. Overview of qualitative research based on ontological, epistemological, and methodological decision making; includes a series of questions to consider during all phases of research.

Maxwell, J. A. (2013). *Qualitative research design: An interactive approach* (3rd ed.). Thousand Oaks, CA: Sage. Particularly thorough book for preparing research proposals by considering how research design elements link together.

Morse, J. M. (2012). *Qualitative health research: Creating a new discipline*. Walnut Creek, CA: Left Coast Press. A rich and insightful primer on researching a disciplinary practice from one of its premiere methodologists; recommended reading for those not in health care.

Richards, L., & Morse, J. M. (2013). *Readme first for a user's guide to qualitative methods* (3rd ed.). Thousand Oaks, CA: Sage. Introduction to principles of qualitative research for phenomenology, ethnography, and grounded theory.

Saldaña, J. (2011). *Fundamentals of qualitative research*. New York: Oxford University Press. A survey of qualitative research methods with an emphasis on qualitative data analysis; good resource for undergraduates.

Saldaña, J. (2015). *Thinking qualitatively: Methods of mind*. Thousand Oaks, CA: Sage. A reader of over 60 modules for thinking about qualitative inquiry, data, and analysis; utilizes principles of brain-based learning for metacognition and research reflection.

Saldaña, J., & Omasta, M. (2018). *Qualitative research: Analyzing life*. Thousand Oaks, CA: Sage. An introductory textbook that utilizes data analysis as a frame and through-line for conducting social inquiry; includes sample articles.

Savin-Baden, M., & Major, C. L. (2013). *Qualitative research: The essential guide to theory and practice*. New York: Routledge. A comprehensive overview of all facets of inquiry, intended as an all-in-one text on the topic.

Stake, R. E. (2010). *Qualitative research: Studying how things work*. New York: Guilford. Introduces global principles of qualitative inquiry, with a focus on interpretation and assertion development.

## MIXED METHODS RESEARCH

---

Bazeley, P. (2018). *Integrating analyses in mixed methods research*. London: Sage. A sophisticated text on how the properties of quantitative and qualitative data analytically integrate; includes numerous examples and graphics from published studies.

Creamer, E. G. (2018). *An introduction to fully integrated mixed methods research*. Thousand Oaks, CA: Sage. Superior introduction to mixed methods and specific strategies for each data paradigm's integration during design, collection, analysis, and write-up.

Creswell, J. W., & Plano Clark, V. L. (2018). *Designing and conducting mixed methods research* (3rd ed.). Thousand Oaks, CA: Sage. Primer on mixing quantitative and qualitative paradigms and data in research studies; includes sample articles.

Morgan, D. L. (2014). *Integrating qualitative & quantitative methods: A pragmatic approach*. Thousand Oaks, CA: Sage. Offers philosophical, methodological, and design guidance for the structure of mixed methods studies.

Morrison, K. (2009). *Causation in educational research*. London: Routledge. Superior overview of the intricacies and nuances of causation in both quantitative and qualitative research; recommended for researchers from all fields of study.

O'Dwyer, L. M., & Bernauer, J. A. (2014). *Quantitative research for the qualitative researcher*. Thousand Oaks, CA: Sage. Introduction to statistics and statistical tests and their integration with the qualitative paradigm.

Plano Clark, V. L., & Ivankova, N. V. (2016). *Mixed methods research: A guide to the field*. Thousand Oaks, CA: Sage. Comprehensive and systematic overview of mixed methods principles and practices; extensive references to the literature.

Tashakkori, A., & Teddlie, C. (Eds.). (2010). *SAGE handbook of mixed methods in social and behavioral research* (2nd ed.). Thousand Oaks, CA: Sage. Extensive chapters on the current trend in mixing the quantitative and qualitative paradigms for research.

Thomas, R. M. (2003). *Blending qualitative and quantitative research methods in theses and dissertations*. Thousand Oaks, CA: Corwin. Overview of methods from both paradigms, but primarily a collection of brief prospectus examples from 20 student works that illustrate the blending of data forms.

## METHODOLOGICAL FOUNDATIONS/ HANDBOOKS OF QUALITATIVE RESEARCH

---

Becker, H. S. (1998). *Tricks of the trade: How to think about your research while you're doing it*. Chicago: University of Chicago Press. A classic in methodology; not a "how to" book but a compelling reader on strategic thinking for inquiry.

Denzin, N. K., & Lincoln, Y. S. (Eds.). (2018). *The SAGE handbook of qualitative research* (5th ed.). Thousand Oaks, CA: Sage. A collection of chapters on various topics of qualitative research by selected experts in the field.

Ellingson, L. L. (2009). *Engaging crystallization in qualitative research: An introduction*. Thousand Oaks, CA: Sage. Strategies for blending two or more approaches to qualitative inquiry, ranging from arts-based approaches to traditional constructivist methodologies (e.g., grounded theory).

Hesse-Biber, S. N., & Leavy, P. (2008). *Handbook of emergent methods*. New York: Guilford. Chapters on new methods of qualitative and selected quantitative inquiry at the beginning of the 21st century, including research with media, mixed methods, documents, and so on.

Leavy, P. (Ed.). (2015). *The Oxford handbook of qualitative research*. New York: Oxford University Press. Chapter collection of practical approaches to all components of qualitative inquiry.

Lincoln, Y. S., & Denzin, N. K. (2003). *Turning points in qualitative research: Tying knots in a handkerchief*. Walnut Creek, CA: AltaMira. Collection of seminal essays and articles in the field of qualitative research by writers such as Clifford Geertz, Margaret Mead, Dwight Conquergood, and others.

Lincoln, Y. S., & Guba, E. G. (1985). *Naturalistic inquiry*. Beverly Hills, CA: Sage. Detailed argument on the naturalistic paradigm as a valid framework for research and analysis; includes methods for establishing trustworthiness and audits.

Packer, M. J. (2011). *The science of qualitative research*. New York: Cambridge University Press. A title on the ontologies and epistemologies of qualitative inquiry; extensive scholarship and overview of knowledge construction.

Pascale, C.-M. (2011). *Cartographies of knowledge: Exploring qualitative epistemologies*. Thousand Oaks, CA: Sage. Overview of theoretical and historical foundations that shape current practices of qualitative research; focuses on analytic induction, symbolic interaction, and ethnomethodology.

## SYMBOLIC INTERACTIONISM

---

Blumer, H. (1969). *Symbolic interactionism: Perspective and method*. Englewood Cliffs, NJ: Prentice Hall. Collection of essays by Blumer detailing the interpretive process of human and group action, labeled “symbolic interactionism”; a seminal method for later research methodologists.

Denzin, N. K. (1992). *Symbolic interactionism and cultural studies: The politics of interpretation*. Cambridge, MA: Blackwell. Commentary and critique on proponents and opponents of symbolic interactionism; Chapter 6, “Interactionist Cultural Criticism,” has applicability to arts and multicultural researchers.

Prus, R. C. (1996). *Symbolic interaction and ethnographic research: Intersubjectivity and the study of human lived experience*. New York: SUNY Press. Detailed explanations and approach to symbolic interactionism and its function in ethnography; excellent discussion and outline of social processes and studying emotions in sociological research.

## ETHNOGRAPHY/ANTHROPOLOGY

---

Angrosino, M. V. (2007). *Doing cultural anthropology: Projects in ethnographic data collection* (2nd ed.). Prospect Heights, IL: Waveland. Excellent primer on ethnographic data collection, with various projects for individuals and groups.

Atkinson, P. (2015). *For ethnography*. London: Sage. Insights and reflections on selected topics of ethnographic practice from one of its foremost writers.

Bernard, H. R. (2018). *Research methods in anthropology: Qualitative and quantitative approaches* (6th ed.). Lanham, MD: Rowman & Littlefield. Reader-friendly and exhaustive overview of research methods in both paradigms; more for advanced researchers with a focus on traditional anthropological field work.

Brown, I. C. (1963). *Understanding other cultures*. Englewood Cliffs, NJ: Prentice Hall. A layperson's introduction to anthropology; despite the early publication date, the book has a remarkable timelessness; surveys basic human constructs such as religion, arts, kinship, values, work, and so on.

Coffey, A. (2018). *Doing ethnography*. London: Sage. An excellent primer of the fundamentals of ethnographic field work and writing; lacks illustrative examples (of field notes, interview transcripts, etc.) but presents an elegant overview of the research method.

Collins, S. G., & Durington, M. S. (2015). *Networked anthropology: A primer for ethnographers*. New York: Routledge. Excellent discussion of how digital and ethnographic practices interface in contemporary field work.

Fetterman, D. M. (2010). *Ethnography: Step by step* (3rd ed.). Thousand Oaks, CA: Sage. Excellent overview of methods and techniques involved with field research from an ethnographic approach; includes information on computer utilization, websites, and data management.

Galman, S. C. (2007). *Shane, the lone ethnographer: A beginner's guide to ethnography*. Walnut Creek, CA: AltaMira. Humorous cartoon drawing overview of a graduate student learning how to conduct an ethnography.

Geertz, C. (1973). *The interpretation of cultures*. New York: Basic Books. Seminal essays on ethnographic writing in anthropology, including "Thick Description: Toward an Interpretive Theory of Culture," and "Deep Play: Notes on a Balinese Cockfight."

Geertz, C. (1983). *Local knowledge: Further essays in interpretive anthropology*. New York: Basic Books. Chapters 1 to 7 present intriguing essays on topics such as "blurred genres," "common sense," and "art" as culturally constructed systems.

Gobo, G., & Molle, A. (2017). *Doing ethnography* (2nd ed.). London: Sage. Detailed introduction to ethnographic practices with an emphasis on the mechanics of field work.

Hammersley, M. (1992). *What's wrong with ethnography?* New York: Routledge. Essays on methodological questions and issues about validity, generalizability, quantitative vs. qualitative, and so on, in ethnographic practice; requires reader background experience in ethnography.

Hammersley, M., & Atkinson, P. (2007). *Ethnography: Principles in practice* (3rd ed.). London: Routledge. A distinctively U.K. approach to the research genre; rigorous and rooted in traditional approaches.

Handwerker, W. P. (2001). *Quick ethnography*. Walnut Creek, CA: AltaMira. Qualitative and quantitative methods for short-term ethnographic work; systematic procedures for extracting variability of cultural variables.

Handwerker, W. P. (2015). *Our story: How cultures shaped people to get things done*. Walnut Creek, CA: Left Coast Press. A brief and intriguing reader on aspects of cognitive anthropology; superior insights on human motivations.

Madden, R. (2017). *Being ethnographic: A guide to the theory and practice of ethnography* (2nd ed.). London: Sage. Excellent conceptual and practical overview of foundations for ethnographic field work; not many examples of "how to" but a solid narrative overview of "what" and "why."

McCurdy, D. W., Spradley, J. P., & Shandy, D. J. (2005). *The cultural experience: Ethnography in complex society* (2nd ed.). Long Grove, IL: Waveland. For undergraduate ethnography courses, provides an overview of ethnographic interviewing and taxonomic domain development; includes students' sample reports.

- Norris, J., Sawyer, R. D., & Lund, D. (Eds.). (2012). *Duoethnography: Dialogic methods for social, health, and educational research*. Walnut Creek, CA: Left Coast Press. A collaborative methodology in which two or more researchers exchange perceptions of personal life histories to better understand a social phenomenon.
- Pink, S. (2013). *Doing visual ethnography* (3rd ed.). London: Sage. An overview of the use of photography, video, and hypermedia in ethnographic field work for representation and presentation.
- Pink, S., Horst, H., Postill, J., Hjorth, L., Lewis, T., & Tacchi, J. (2016). *Digital ethnography: Principles and practice*. London: Sage. Excellent discussion of how digital culture is examined through an ethnographic lens; explores relationships, events, materiality.
- Sunstein, B. S., & Chiseri-Strater, E. (2012). *FieldWorking: Reading and writing research* (4th ed.). Boston: Bedford/St. Martin's. User-friendly introduction to ethnographic field work; includes numerous student samples of writing.
- Thomas, J. (1993). *Doing critical ethnography*. Newbury Park, CA: Sage. Monograph on critical approaches to qualitative research to examine power structures, race relationships, and so on, for social change.
- Wiseman, B., & Groves, J. (1997). *Lévi-Strauss for beginners*. London: Icon Books. An introduction to the major cultural theories by one of the 20th century's most noted structural anthropologists.
- Wolcott, H. F. (2005). *The art of fieldwork* (2nd ed.). Walnut Creek, CA: AltaMira. An overview of fundamental principles and sage advice on educational anthropology from one of the leaders in the field.
- Wolcott, H. F. (2008). *Ethnography: A way of seeing* (2nd ed.). Walnut Creek, CA: AltaMira. For those with some ethnographic background, a foundational text on the purposes and charges of ethnography; superior chapter (Chapter 11) on the concept of culture.

## GROUNDED THEORY

---

- Birks, M., & Mills, J. (2016). *Grounded theory: A practical guide* (2nd ed.). London: Sage. General descriptive overview of the method; includes a few examples for guidance.
- Bryant, A. (2017). *Grounded theory and grounded theorizing: Pragmatism in research practice*. New York: Oxford University Press. Superior methodological discussion of the various approaches to and components of grounded theory.
- Bryant, A., & Charmaz, K. (2007). *The SAGE handbook of grounded theory*. London: Sage. Chapters on the nuances of grounded theory methodology; not for beginners of the method.
- Charmaz, K. (2014). *Constructing grounded theory* (2nd ed.). London: Sage. A clear and concise overview of grounded theory method; provides an excellent theoretical and explanatory overview of the classic procedures developed by Strauss, Glaser, and Corbin.
- Clarke, A. E., Friese, C., & Washburn, R. S. (2018). *Situational analysis: Grounded theory after the interpretive turn* (2nd ed.). Thousand Oaks, CA: Sage. Adaptation of grounded theory, which acknowledges the complexity and context of social process through the development of situational maps, charts, and graphics; extensive background on epistemological foundations for the method.
- Corbin, J., & Strauss, A. L. (2015). *Basics of qualitative research: Techniques and procedures for developing grounded theory* (4th ed.). Thousand Oaks, CA: Sage. The fourth edition does not systematically focus on techniques; it does, however, profile analytic memo writing extensively.
- Gibson, B., & Hartman, J. (2014). *Discovering grounded theory*. London: Sage. Offers a detailed overview of the classical/traditional approaches to grounded theory with excellent guidance on analytic memoing.



Glaser, B. G., & Strauss, A. L. (1967). *The discovery of grounded theory: Strategies for qualitative research*. Hawthorne, CA: Aldine de Gruyter. Premiere work on the constant-comparative method of data analysis to generate grounded theory.

Holton, J. A., & Walsh, I. (2017). *Classic grounded theory: Applications with qualitative & quantitative data*. Thousand Oaks, CA: Sage. An overview of traditional grounded theory principles as originally conceived and their execution with projects.

Stern, P. N., & Porr, C. J. (2011). *Essentials of accessible grounded theory*. Walnut Creek, CA: Left Coast Press. An elegant summary and synthesis of “classic” Glaserian grounded theory.

Urquhart, C. (2013). *Grounded theory for qualitative research: A practical guide*. London: Sage. Follows traditional models and procedures for grounded theory research; excellent discussion on how theory derives from data analysis and memoing.

## PHENOMENOLOGY

---

Brinkmann, S. (2012). *Qualitative inquiry in everyday life: Working with everyday life materials*. London: Sage. Fascinating self-exploration of and research about everyday experiences, including our interactions with humans, media, fiction, and artifacts.

Smith, J. A., Flowers, P., & Larkin, M. (2009). *Interpretative phenomenological analysis: Theory, method and research*. London: Sage. Interpretative phenomenological analysis from a psychological perspective; clear description of the origins and processes; includes sample studies that use interpretative phenomenological analysis.

Vagle, M. D. (2018). *Crafting phenomenological research* (2nd ed.). New York: Routledge. Elegant overview of phenomenological philosophy and practices through a “post-intentional” lens.

van Manen, M. (1997). *Researching lived experience: Human science for an action sensitive pedagogy* (2nd ed.). New York: Routledge. A classic of the field; focus is on phenomenology and its reporting, plus the purposes of this type of research, primarily in education.

## CASE STUDY RESEARCH

---

Denzin, N. K. (2001). *Interpretive interactionism* (2nd ed.). Thousand Oaks, CA: Sage. Methodology and methods for biographical research of an individual’s epiphanies.

Stake, R. E. (1995). *The art of case study research*. Thousand Oaks, CA: Sage. “Artistic” approach to profiling the case study; a good introduction to the method.

Yin, R. K. (2018). *Case study research and applications: Design and methods* (6th ed.). Thousand Oaks, CA: Sage. Overview of research design principles for case studies of individuals, organizations, and so on; somewhat post-positivist in its approach, but a good overview of the fundamentals of design and analysis.

## EVALUATION RESEARCH

---

Patton, M. Q. (2015). *Qualitative research and evaluation methods: Integrating theory and practice* (4th ed.). Thousand Oaks, CA: Sage. Designed for evaluation research initially, now an excellent overview of paradigms, methods and techniques for observation and interviews.

Patton, M. Q. (2008). *Utilization-focused evaluation* (4th ed.). Thousand Oaks, CA: Sage. Exhaustive resource for evaluation methods, especially for programs and organizations.

Wadsworth, Y. (2011). *Everyday evaluation on the run: The user-friendly introductory guide to effective evaluation* (3rd ed.). Walnut Creek, CA: Left Coast Press. A layperson's guide, but includes a broad overview of basics and models.

## AUTOETHNOGRAPHY

---

Adams, T. E., Jones, S. H., & Ellis, C. (2015). *Autoethnography*. New York: Oxford University Press. Introductory overview of the principles and methods of writing autoethnography.

Chang, H. (2008). *Autoethnography as method*. Walnut Creek, CA: Left Coast Press. Systematic approach to autoethnographic research; includes an excellent overview of cultural concepts.

Ellis, C., & Bochner, A. P. (Eds.). (1996). *Composing ethnography: Alternative forms of qualitative writing*. Walnut Creek, CA: AltaMira. Collection of autoethnographies focusing on social issues such as domestic violence, bulimia, detoxification, and discrimination.

Jones, S. H., Adams, T. E., & Ellis, C. (Eds.). (2013). *Handbook of autoethnography*. Walnut Creek, CA: Left Coast Press. Comprehensive collection of chapters on method and exemplars of autoethnographic writing.

Poulos, C. N. (2009). *Accidental ethnography: An inquiry into family secrecy*. Walnut Creek, CA: Left Coast Press. Autoethnographic stories and writing prompts for personal and family history.

Spry, T. (2011). *Body, paper, stage: Writing and performing autoethnography*. Walnut Creek, CA: Left Coast Press. Selected works from Spry, plus theoretical and practical approaches to performance studies.

## NARRATIVE INQUIRY

---

Clandinin, D. J., & Connelly, F. M. (2000). *Narrative inquiry: Experience and story in qualitative research*. San Francisco: Jossey-Bass. Methods of three-dimensional renderings of participants in narrative inquiry.

Daiute, C. (2014). *Narrative inquiry: A dynamic approach*. Thousand Oaks, CA: Sage. Offers specific analytic approaches to narratives, focusing on features such as values, plot, significance, character, and time.

Gubrium, J. F., & Holstein, J. A. (2009). *Analyzing narrative reality*. Thousand Oaks, CA: Sage. Not a "how to" book, but an excellent overview of what to be aware of and look for when analyzing narrative texts from field work.

Holstein, J. A., & Gubrium, J. F. (2012). *Varieties of narrative analysis*. Thousand Oaks, CA: Sage. Chapter collection of varied approaches to the analysis of narrative texts, ranging from mixed methods to psychological interpretations.

Kim, J.-H. (2016). *Understanding narrative inquiry: The crafting and analysis of stories as research*. Thousand Oaks, CA: Sage. Provides an overview of the method, ranging from theoretical foundations, data collection, and write-ups as narratives.

Riessman, C. K. (2008). *Narrative methods for the human sciences*. Thousand Oaks, CA: Sage. Not necessarily a "how to" text, but surveys with examples of four major approaches to narrative analysis; contains representative examples about children and adolescents.



## DISCOURSE AND CONVERSATION ANALYSIS

---

Bischoping, K., & Gazso, A. (2016). *Analyzing talk in the social sciences*. London: Sage. Three strategies for analyzing talk—narrative, conversation, and discourse analysis—are profiled with examples and guidance.

Boréus, K., & Bergström, G. (Eds.). (2017). *Analyzing text and discourse: Eight approaches for the social sciences*. London: Sage. Chapter collection of approaches such as content analysis, narrative analysis, argumentation analysis, discourse analysis, metaphor analysis, and so on.

Gee, J. P. (2014). *How to do discourse analysis: A toolkit* (2nd ed.). New York: Routledge. A series of questions and perspectives to consider when analyzing language in documented data and narratives; considers aspects such as grammar, vocabulary, intertextuality, identity, politics, and so on.

Lester, J. N., & O'Reilly, M. (2019). *Applied conversation analysis*. Thousand Oaks, CA: Sage. An introduction to the method for graduate students and novices; utilizes the Jefferson notation system for data documentation and analysis.

Rapley, T. (2018). *Doing conversation, discourse and document analysis*. London: Sage. A primer in the topic areas with examples; includes good recording and transcription recommendations.

## ARTS-BASED RESEARCH

---

Akcroyd, J., & O'Toole, J. (2010). *Performing research: Tensions, triumphs and trade-offs of ethnodrama*. Stoke on Trent, England: Trentham Books. Treatise on the genre (terminology, ethics, representation, etc.) and six case studies of ethnodrama projects in Australia and Hong Kong.

Barone, T., & Eisner, E. W. (2012). *Arts based research*. Thousand Oaks, CA: Sage. Two pioneers in the genre offer methodological and aesthetic perspectives and criteria for this approach to qualitative inquiry.

Batty, C., & Kerrigan, S. (Eds.). (2018). *Screen production research: Creative practice as a mode of enquiry*. Cham, Switzerland: Palgrave Macmillan. Chapter collection of scholarly pieces on screenplays and film production as forms of qualitative research.

Butler-Kisber, L. (2018). *Qualitative inquiry: Thematic, narrative and arts-based perspectives* (2nd ed.). London: Sage. Overview of various modalities of qualitative inquiry, including approaches such as narrative, phenomenology, collage, poetry, photography, and performance.

Cahnmann-Taylor, M., & Siegesmund, R. (Eds.). (2018). *Arts-based research in education: Foundations for practice* (2nd ed.). New York: Routledge. Chapter collection from leading figures in the field on the use of the arts with and as educational research.

Denzin, N. K. (1997). *Interpretive ethnography: Ethnographic practices for the 21st century*. Thousand Oaks, CA: Sage. Inspirational reading about new, progressive forms of ethnography including performance texts, journalism, and poetics.

Eisner, E. W. (1993). *The enlightened eye: Qualitative inquiry and the enhancement of educational practice*. New York: Macmillan. An “artistic” approach to qualitative inquiry. Does not profile methods but provides an intriguing, commonsense approach to knowledge construction by the researcher.

Gergen, M. M., & Gergen, K. J. (2012). *Playing with purpose: Adventures in performative social science*. Walnut Creek, CA: Left Coast Press. Overview of arts-based modalities in qualitative inquiry—narrative, drama, visual art—and their theoretical groundings.

- Janesick, V. J. (2015). *“Stretching” exercises for qualitative researchers* (4th ed.). Thousand Oaks, CA: Sage. A series of arts-based exercises for honing observation, interview, and conceptualization skills of researchers.
- Knowles, J. G., & Cole, A. L. (2008). *Handbook of the arts in qualitative research: Perspectives, methodologies, examples, and issues*. Thousand Oaks, CA: Sage. Collection of essays on arts-based research, including theatre.
- Leavy, P. (2015). *Method meets art: Arts-based research practice* (2nd ed.). New York: Guilford. Chapter overview of arts-based research techniques, with representative samples of the genre.
- Leavy, P. (Ed.). (2018). *Handbook of arts-based research*. New York: Guilford. Chapter collection of premiere writers and artists in the field showcasing their methods and work.
- Madison, D. S., & Hamera, J. (2006). *The SAGE handbook of performance studies*. Thousand Oaks, CA: Sage. Collection of essays on the field of performance studies; includes a few good selections.
- Nisbet, R. (1976). *Sociology as an art form*. New York: Oxford University Press. Comparison of how the fine arts, humanities, and sociology have historic parallels in paradigm development and conceptual approaches; also addresses modern parallels in the goals and functions of both disciplines.
- Norris, J. (2010). *Playbuilding as qualitative research: A participatory arts-based approach*. Walnut Creek, CA: Left Coast Press. Norris examines how playbuilding original devised work both employs and serves as a qualitative research modality/genre.
- Saldaña, J. (2005). *Ethnodrama: An anthology of reality theatre*. Walnut Creek, CA: AltaMira Press. Collection of nine examples of play scripts developed from qualitative and ethnographic research (interviews, participant observation).
- Saldaña, J. (2011). *Ethnotheatre: Research from page to stage*. Walnut Creek, CA: Left Coast Press. A playwriting textbook for ethnodramatic forms of research representation and presentation; includes extensive bibliographies of plays, articles, media, and texts.

## ACTION/PARTICIPATORY ACTION RESEARCH

- Altrichter, H., Feldman, A., Posch, P., & Somekh, B. (2008). *Teachers investigate their work: An introduction to action research across the professions* (2nd ed.). New York: Routledge. Superior text on action research; includes practical examples and techniques for generating a focal point and analyzing data.
- Coghlan, D., & Brannick, T. (2014). *Doing action research in your own organization* (4th ed.). London: Sage. Dense, but practical, manual on the logistics of action research in business and education; not much on data analysis, but superior foregrounding, especially on the human aspects of change.
- Fox, M., Martin, P., & Green, G. (2007). *Doing practitioner research*. London: Sage. Superior overview of practitioner research for those in the service and helping professions; provides excellent foundations for clinical and educational research.
- Hitchcock, G., & Hughes, D. (1995). *Research and the teacher: A qualitative introduction to school-based research* (2nd ed.). London: Routledge. General survey of how the teacher can also play the role of researcher in the classroom; examples tailored to the British school system, but the methods are universal.
- Schön, D. A. (1983). *The reflective practitioner: How professionals think in action*. New York: Basic Books. Methodological basis of “reflection-in-action” in selected professions; describes the cognitive and communicative processes of problem solving; a foundational book for action researchers.
- Stringer, E. T. (2014). *Action research* (4th ed.). Thousand Oaks, CA: Sage. Detailed methods for community and collaborative research projects to improve or change existing social practices.

Thomas, R. M. (2005). *Teachers doing research: An introductory guidebook*. Boston: Pearson Education. General overview of teacher-as-researcher models in quantitative and qualitative studies; provides brush-stroke description and examples.

Wadsworth, Y. (2011). *Do it yourself social research* (3rd ed.). Walnut Creek, CA: Left Coast Press. An introductory overview of basic social research principles for community program evaluation.

## LONGITUDINAL/LIFE COURSE RESEARCH

---

Giele, J. Z., & Elder, G. H., Jr. (Eds.). (1998). *Methods of life course research: Qualitative and quantitative approaches*. Thousand Oaks, CA: Sage. Collection of essays on longitudinal (retrospective and prospective) research with individuals and populations; exceptional chapter by John Clausen, "Life Reviews and Life Stories."

Holstein, J. A., & Gubrium, J. F. (2000). *Constructing the life course* (2nd ed.). Dix Hills, NY: General Hall. Reconceptualizes for the reader how traditional life course constructs (cycles, development, stages, etc.) have been socially constructed and potentially misused for assessment in education and therapy.

McLeod, J., & Thomson, R. (2009). *Researching social change*. London: Sage. Complex but rich ways of researching change through ethnographic, longitudinal, oral history, and other methods.

Saldaña, J. (2003). *Longitudinal qualitative research: Analyzing change through time*. Walnut Creek, CA: AltaMira. Methods book on long-term fieldwork and data analysis; uses three education studies as examples throughout the text.

## SOCIOLOGY (GENERAL TEXTBOOKS)

---

Charon, J. M. (2013). *Ten questions: A sociological perspective* (8th ed.). Belmont, CA: Wadsworth Thomson Learning. Superior overview of basic sociological principles and theories, such as social reality, inequality, ethnocentrism, social change, and so on.

Churton, M., & Brown, A. (2010). *Theory and method* (2nd ed.). New York: Palgrave Macmillan. From sociology, an excellent overview of traditional, modern, and postmodern theories of the field.

Cuzzort, R. P., & King, E. W. (2002). *Social thought into the twenty-first century* (6th ed.). Orlando, FL: Harcourt. An overview of the major works of 17 prominent social thinkers, such as Marx, Goffman, Freud, and Mead; each chapter profiles the writer's prominent theories through everyday examples.

Massey, G. (2016). *Ways of social change: Making sense of modern times* (2nd ed.). Thousand Oaks, CA: Sage. A superior and rich discussion of the ways change occurs in such social domains as the state, technology, war, business, culture, and so on.

Meer, N., & Gabler, J. (2011). *Sociology for dummies*. Hoboken, NJ: Wiley. A thorough yet readable overview of sociological principles, writers, and concepts.

## PSYCHOLOGY AND QUALITATIVE RESEARCH

---

Brooks, J., & King, N. (Eds.). (2017). *Applied qualitative research in psychology*. London: Palgrave. Chapter collection of methodological pieces using different approaches to inquiry (phenomenology, discourse analysis, appreciative inquiry, etc.).

Camic, P. M., Rhodes, J. E., & Yardley, L. (Eds.). (2003). *Qualitative research in psychology: Expanding perspectives in methodology and design*. Washington, DC: American Psychological Association. Chapter

collection of qualitative methods for psychological research, therapy, and so on; good overview of some approaches commonly referenced in the area.

Chirkov, V. (2016). *Fundamentals of research on culture and psychology*. New York: Routledge. Superior text on conceptual foundations and thinking for studies that blend the ethnographic and psychological. Provides insider knowledge of psychological facets in studies of culture.

Forrester, M. A. (Ed.). (2010). *Doing qualitative research in psychology: A practical guide*. London: Sage. A handbook of the methodology; includes pragmatic sections on discourse analysis, grounded theory, phenomenology, and conversation analysis.

Rohleder, P., & Lyons, A. C. (Eds.). (2015). *Qualitative research in clinical and health psychology*. London: Palgrave. Chapter collection of methodological pieces using different approaches to inquiry (phenomenology, conversation analysis, discourse analysis, grounded theory, thematic analysis, etc.).

Smith, J. A. (Ed.). (2015). *Qualitative psychology: A practical guide to research methods* (3rd ed.). London: Sage. Not just for psychology but for all social science fields; excellent chapter overviews of methods such as grounded theory, plus narrative, discourse, conversation analysis, and so on.

## COMMUNICATION AND QUALITATIVE RESEARCH

---

Hansen, A., & Machin, D. (2013). *Media & communication research methods*. New York: Palgrave Macmillan. Overview of research approaches (content analysis, discourse analysis, focus groups, surveys, etc.) with media content and talk.

Lindlof, T. R., & Taylor, B. C. (2019). *Qualitative communication research methods* (4th ed.). Thousand Oaks, CA: Sage. General textbook overview of qualitative research in human communication.

Tracy, S. J. (2013). *Qualitative research methods: Collecting evidence, crafting analysis, communicating impact*. Oxford, UK: Wiley-Blackwell. An excellent introductory methods text with multiple student exercises and ancillary materials.

## QUALITATIVE RESEARCH IN EDUCATION (GENERAL TEXTBOOKS)

---

Bogdan, R. C., & Biklen, S. K. (2007). *Qualitative research for education: An introduction to theory and methods* (5th ed.). Boston: Allyn & Bacon. Excellent overview of the method, with an emphasis on field work; includes good sections on development of qualitative research, photograph analysis, and the novice researcher.

Eisner, E. W. (1998). *The kind of schools we need: Personal essays*. Portsmouth, NH: Heinemann. Several essays provide foundations for research in the arts and arts-based approaches to research; sections include “The Arts and Their Role in Education,” “Cognition and Representation,” and “Rethinking Educational Research.”

Lancy, D. F. (1993). *Qualitative research in education: An introduction to the major traditions*. New York: Longman. A survey of types of qualitative research, with examples in fields such as anthropology, sociology, and education.

LeCompte, M. D., & Preissle, J. (1993). *Ethnography and qualitative design in educational research* (2nd ed.). San Diego, CA: Academic Press. Detailed methods for the design and execution of qualitative studies in the classroom.

Merriam, S. B., & Tisdell, E. J. (2016). *Qualitative research: A guide to design and implementation* (4th ed.). San Francisco: Jossey-Bass. Superior introductory textbook, primarily for those in education; elegantly written and clear procedures.

Wolcott, H. F. (2003). *Teachers vs. technocrats: An educational innovation in anthropological perspective* (Updated ed.). Walnut Creek, CA: AltaMira. A case study that illustrates the concept of “moieties” (dual/opposing cultures) in education between teachers and administrators.

## RESEARCH WITH CHILDREN AND ADOLESCENTS

---

Christensen, P., & James, A. (Eds.). (2017). *Research with children: Perspectives and practices* (3rd ed.). New York: Routledge. Collection of essays about theoretical and social dimensions of researching children; includes chapters on working with children in war-affected areas, street children, and the disabled.

Clark, C. D. (2011). *In a younger voice: Doing child-centered qualitative research*. New York: Oxford University Press. Wonderful insider knowledge and nuances on researching children; excellent coverage of interpersonal dynamics between adults and youth.

Corsaro, W. A. (2015). *The sociology of childhood* (4th ed.). Thousand Oaks, CA: Sage. Outstanding resource on sociological dimensions of children and youth; cross-national comparisons and current U.S. statistics and trends presented.

Fine, G. A., & Sandstrom, K. L. (1988). *Knowing children: Participant observation with minors*. Newbury Park, CA: Sage. Monograph on the techniques and ethical issues of research with preschoolers through adolescents.

Freeman, M., & Mathison, S. (2009). *Researching children's experiences*. New York: Guilford. Superior, straightforward survey of researching children from a constructivist perspective.

Galman, S. C. (2019). *Naptime at the O.K. Corral: Shane's beginner's guide to childhood ethnography*. New York: Routledge. Galman presents, in comic book format, an introduction to the theories, history, methods, and ethics of research with children.

Graue, M. E., & Walsh, D. J. (1998). *Studying children in context: Theories, methods, and ethics*. Thousand Oaks, CA: Sage. Overview of methods of social science research with children; includes sample studies and excellent advice through all stages of the research process.

Greene, S., & Hogan, D. (2005). *Researching children's experience: Approaches and methods*. London: Sage. Excellent chapters on qualitative research with children, from interviews to participant observation to arts-based methods.

Greig, A. D., Taylor, J., & MacKay, T. (2013). *Doing research with children: A practical guide* (3rd ed.). London: Sage. Overview of classic/traditional and contemporary methods of data gathering from children; focuses primarily on preschool and younger children; excellent theoretical overview.

Hatch, J. A. (Ed.). (2007). *Early childhood qualitative research*. New York: Routledge. Collection of essays, including digital video, action research, focus groups, and so on, on research with young children.

Heiligman, D. (1998). *The New York Public Library kid's guide to research*. New York: Scholastic. Designed for upper elementary grades, an overview of basic research strategies and tools, including the Internet, conducting interviews and surveys, and fieldwork.

Holmes, R. M. (1998). *Fieldwork with children*. Thousand Oaks, CA: Sage. Practical advice on interviewing and observing children and gaining entry to their world; focuses on how gender interplays with rapport.

Lancy, D. F., Bock, J., & Gaskins, S. (Eds.). (2010). *The anthropology of learning in childhood*. Walnut Creek, CA: AltaMira. Outstanding chapters on how children from various cultures “learn,” in its broadest sense; rich concepts, yet written in accessible language; not a “how to” book but an exceptional model for documenting participant observation.

Mukherji, P., & Albon, D. (2015). *Research methods in early childhood: An introductory guide* (2nd ed.). London: Sage. Readable overview of quantitative and qualitative research design approaches to research with young children; emphasizes British perspectives but applicable to U.S. youth.

O'Reilly, M., & Dogra, N. (2017). *Interviewing children and young people for research*. London: Sage. Excellent overview of all aspects of interviewing youth; includes insightful strategies for adult researchers' language use and interactions.

Pellegrini, A. D. (2013). *Observing children in their natural worlds: A methodological primer* (3rd ed.). New York: Psychology Press. A primarily quantitative and systematic approach to observing young people's behaviors; includes a chapter by John Hoch and Frank J. Symons on new technology methods for data collection and analysis.

Roberts-Holmes, G. (2014). *Doing your early years research project: A step-by-step guide* (3rd ed.). London: Sage. Geared for U.K. schools; provides an elegant overview of research design and data collection methods for graduate student projects.

Thomson, P. (Ed.). (2008). *Doing visual research with children and young people*. London: Routledge. Excellent collection of chapters on using photography, video, scrapbooks, drawings, and other visual materials as data when researching children.

Tisdall, E. K., Davis, J. M., & Gallagher, M. (2009). *Researching with children and young people: Research design, methods and analysis*. London: Sage. Superior collection of methods and case study profiles for designing and conducting research with children; geared toward U.K. programs but still has relevance for U.S. readers.

## QUALITATIVE DATA COLLECTION

---

Braun, V., Clarke, V., & Gray, D. (Eds.). (2017). *Collecting qualitative data: A practical guide to textual, media and virtual techniques*. Cambridge, UK: Cambridge University Press. Outstanding collection of chapters on newer forms of data collection (social media, talk radio, blogs, e-mail interviews, instant messaging, etc.) for analysis.

Guest, G., Namey, E. E., & Mitchell, M. L. (2013). *Collecting qualitative data: A field manual for applied research*. Thousand Oaks, CA: Sage. Detailed methods for sampling, participant observation, interviews, focus groups, and data management.

## INTERVIEWING

---

Brinkmann, S., & Kvale, S. (2015). *Interviews: Learning the craft of qualitative research interviewing* (3rd ed.). Thousand Oaks, CA: Sage. Overview of interview methods for qualitative inquiry.

Gubrium, J. F., Holstein, J. A., Marvasti, A. B., & McKinney, K. D. (Eds.). (2012). *The SAGE handbook of interview research: The complexity of the craft* (2nd ed.). Thousand Oaks, CA: Sage. Superior collection of chapters on all aspects of interviewing, including methods, analysis, and ethics.

Janesick, V. J. (2010). *Oral history for the qualitative researcher: Choreographing the story*. New York: Guilford. Includes an overview of oral history documentation with multiple examples; includes references to many resources for learning more about the genre.



Krueger, R. A., & Casey, M. A. (2015). *Focus groups: A practical guide for applied research* (5th ed.). Thousand Oaks, CA: Sage. Detailed manual on techniques for planning and moderating focus groups for corporate and nonprofit research.

Mears, C. L. (2009). *Interviewing for education and social science research: The gateway approach*. New York: Palgrave Macmillan. Outstanding resource on interviewing participants, with transformation of transcripts into poetic mosaics.

Morgan, D. L. (1997). *Focus groups as qualitative research* (2nd ed.). Thousand Oaks, CA: Sage. The design, dynamics, and analysis of group interviews.

Roulston, K. (2010). *Reflective interviewing: A guide to theory and practice*. London: Sage. Superior treatise on interviewing participants, ranging from theory to technique.

Rubin, H. J., & Rubin, I. S. (2012). *Qualitative interviewing: The art of hearing data* (3rd ed.). Thousand Oaks, CA: Sage. Excellently detailed overview of designing and conducting interviews, with numerous examples from the authors' studies.

Seidman, I. (2013). *Interviewing as qualitative research: A guide for researchers in education and the social sciences* (4th ed.). New York: Teachers College Press. Specific techniques and methods for conducting three-series, in-depth interviews with adult participants.

Spradley, J. P. (1979). *The ethnographic interview*. New York: Holt, Rinehart & Winston. Essential reading for interviewing techniques; analytic methods are exclusively Spradley's, but they have become "standard" to some methodologists.

## PARTICIPANT OBSERVATION

---

Adler, P. A., & Adler, P. (1987). *Membership roles in field research*. Newbury Park, CA: Sage. Describes three types of participant observation for researchers in field settings.

Angrosino, M. V. (2007). *Naturalistic observation*. Walnut Creek, CA: Left Coast Press. Not a "how to" book but an excellent primer on all facets of ethnographic participant observation.

DeWalt, K. M., & DeWalt, B. R. (2011). *Participant observation: A guide for fieldworkers* (2nd ed.). Lanham, MD: AltaMira. Geared toward anthropological studies, the text reviews methods of taking field notes and interviewing participants.

Emerson, R. M., Fretz, R. I., & Shaw, L. L. (2011). *Writing ethnographic fieldnotes* (2nd ed.). Chicago: University of Chicago Press. Superior overview of the field note-taking process and how it springboards to analysis and write-up.

Spradley, J. P. (1980). *Participant observation*. New York: Holt, Rinehart & Winston. Companion volume to Spradley's *The Ethnographic Interview*; much is reiterated in this text, but the focus is on observation techniques.

## ARTIFACTS, VISUAL AND MATERIAL CULTURE

---

Banks, M. (2018). *Using visual data in qualitative research*. London: Sage. Provides theoretical, methodological, and applied foundations for the analysis of visual materials (photographs, film, etc.), with case references to exemplars in the field.

Banks, M., & Zeitlyn, D. (2015). *Visual methods in social research* (2nd ed.). London: Sage. Overview of the analysis and making of digital visual materials such as photographs, film, and multimedia.

- Berger, A. A. (2014). *What objects mean: An introduction to material culture* (2nd ed.). New York: Routledge. Elegant and clearly explained approaches to the critical and cultural analysis of artifacts.
- Brown, S., Clarke, A., & Frederick, U. (Eds.). (2015). *Object stories: Artifacts and archeologists*. Walnut Creek, CA: Left Coast Press. Chapter collection of brief profiles of archeologists reflecting on the meanings of significant artifacts from field work.
- Ledin, P., & Machin, D. (2018). *Doing visual analysis: From theory to practice*. London: Sage. Superior compendium of design elements and their connotations for the visual analysis of materials such as photographs, documents, space, and product/advertising media.
- Margolis, E., & Pauwels, L. (Eds.). (2011). *The SAGE handbook of visual research methods*. London: Sage. An exhaustive collection of chapters devoted to visual analysis of photographs, film, digital work, material culture, and so on.
- Moss, J., & Pini, B. (Eds.). (2016). *Visual research methods in educational research*. New York: Palgrave Macmillan. Chapter collection on the uses of visual research with young people; several selections offer intriguing ideas and discuss unique projects.
- Spencer, S. (2011). *Visual research methods in the social sciences: Awakening visions*. New York: Routledge. Fieldwork practices with data collection and analysis of visual materials; explores place, identity, and the use of media technology in analysis.

## QUALITATIVE DATA ANALYSIS

---

- Abbott, A. (2004). *Methods of discovery: Heuristics for the social sciences*. New York: Norton. Excellent overview of current methodological debates in social science research and examples of problem-solving strategies used in landmark studies; provides guidance for seeing data and their analyses in new ways.
- Auerbach, C. F., & Silverstein, L. B. (2003). *Qualitative data: An introduction to coding and analysis*. New York: New York University Press. Systematic procedures for finding “relevant text” in transcripts for pattern and thematic development; very readable, with good examples of procedures.
- Bazeley, P. (2013). *Qualitative data analysis: Practical strategies*. London: Sage. Comprehensive compendium of analytic approaches ranging from data management to coding to theory building.
- Bernard, H. R., Wutich, A., & Ryan, G. W. (2017). *Analyzing qualitative data: Systematic approaches* (2nd ed.). Thousand Oaks, CA: Sage. The emphasis is on systematic rather than interpretive approaches, meaning forms of content analysis, discourse analysis, and so on.
- Boeije, H. (2010). *Analysis in qualitative research*. London: Sage. Primarily explicates the grounded theory model of qualitative research and data analysis, yet does a good job of explaining its procedures.
- Bryman, A., & Burgess, R. G. (Eds.). (1994). *Analyzing qualitative data*. London: Routledge. Series of chapters describing the behind-the-scenes coding and analytic work of researchers.
- Dey, I. (1993). *Qualitative data analysis: A user-friendly guide for social scientists*. London: Routledge. An excellent overview of specific techniques such as creating categories and splitting, splicing, linking, and connecting data.
- Erickson, F. (1986). Qualitative methods in research on teaching. In M. C. Wittrock (Ed.), *Handbook of research on teaching* (3rd ed., pp. 119–161). New York: Macmillan. Classic chapter on an intuitive approach to qualitative inquiry through heuristics of assertion development.
- Ezzy, D. (2002). *Qualitative analysis: Practice and innovation*. London: Routledge. Readable introduction to and overview of qualitative inquiry; explains conceptual ideas clearly.

Fielding, N. G., & Fielding, J. L. (1986). *Linking data*. Beverly Hills, CA: Sage. Monograph on the technique of triangulation with multiple methods of data gathering.

Flick, U. (Ed.). (2014). *The SAGE handbook of qualitative data analysis*. London: Sage. Chapter collection of international authors addressing various facets of qualitative data analysis.

Freeman, M. (2017). *Modes of thinking for qualitative data analysis*. New York: Routledge. Superior methodological guidance for five modes of analytic thought (categorical, narrative, dialectical, poetical, and diagrammatical).

Galman, S. C. (2013). *The good, the bad, and the data: Shane the lone ethnographer's basic guide to qualitative data analysis*. Walnut Creek, CA: Left Coast Press. A comic-based overview of fundamental principles of analysis; a sequel to Galman's *Shane, The Lone Ethnographer*.

Gibbs, G. R. (2018). *Analyzing qualitative data* (2nd ed.). London: Sage. Monograph with an overview of fundamental data-analytic techniques, with excellent content on narrative analysis and comparative analysis.

Grbich, C. (2013). *Qualitative data analysis: An introduction* (2nd ed.). London: Sage. Not a "how to" guide but an introductory overview of the types of analysis (e.g., grounded theory, narrative analysis, content analysis) available to qualitative researchers.

Guest, G., & MacQueen, K. M. (2008). *Handbook for team-based qualitative research*. Lanham, MD: AltaMira. Chapters on team research, including ethics, politics, coding, and data management.

Guest, G., MacQueen, K. M., & Namey, E. E. (2012). *Applied thematic analysis*. Thousand Oaks, CA: Sage. Systematic qualitative and quantitative procedures for segmenting and analyzing themes (in their broadest sense) for research reports; emphasizes team research collaboration.

Knowlton, L. W., & Phillips, C. C. (2013). *The logic model guidebook: Better strategies for great results* (2nd ed.). Thousand Oaks, CA: Sage. Graphic displays for program and theory of change models; illustrates possible complex interconnections.

LeCompte, M. D., & Schensul, J. J. (2012). *Analysis and interpretation of ethnographic data: A mixed methods approach* (2nd ed.; Ethnographer's Toolkit Series, Book 5). Lanham, MD: AltaMira. Overview of primarily qualitative analytic strategies for traditional ethnographies; provides a systematic approach to data management, analysis, and integration with quantitative data.

Lyons, E., & Coyle, C. (2016). *Analysing qualitative data in psychology* (2nd ed.). London: Sage. Overview of four approaches to data analysis in psychology: interpretative phenomenological analysis, grounded theory, discourse analysis, and narrative analysis—the latter includes a superior interview protocol for autobiographical/biographical work.

Northcutt, N., & McCoy, D. (2004). *Interactive qualitative analysis: A systems method for qualitative research*. Thousand Oaks, CA: Sage. For focus group synthesis—the development of flow charts for process through systematic qualitative analytic procedures.

Richards, L. (2015). *Handling qualitative data: A practical guide* (3rd ed.). London: Sage. An overview of data management principles before and during analysis; excellent content on category construction.

Saldaña, J. (2016). *The coding manual for qualitative researchers* (3rd ed.). London: Sage. Profiles 32 different methods for coding qualitative data; includes examples, along with ways to develop analytic memos.

Schreier, M. (2012). *Qualitative content analysis in practice*. London: Sage. Systematic procedures for qualitative content analysis; a hybrid blend of qualitative and quantitative approaches.

Sullivan, P. (2012). *Qualitative data analysis using a dialogical approach*. London: Sage. Intriguing methods for qualitative data analysis, particularly for thematic and discourse analysis; first three chapters are heavy on theory but lay the foundation for Sullivan's analytic methods in the remaining chapters.

Vogt, W. P., Vogt, E. R., Gardner, D. C., & Haeffele, L. M. (2014). *Selecting the right analyses for your data: Quantitative, qualitative, and mixed methods*. New York: Guilford. Emphasis in this book is placed on the quantitative, but the discussion on coding for both paradigms is worthwhile reading for mixed methods researchers.

Wertz, F. J., Charmaz, K., McMullen, L. M., Josselson, R., Anderson, R., & McSpadden, E. (2011). *Five ways of doing qualitative analysis: Phenomenological psychology, grounded theory, discourse analysis, narrative research, and intuitive inquiry*. New York: Guilford. A detailed examination of an interview transcript through five methods of data analysis: phenomenological psychology, grounded theory, discourse analysis, narrative research, and intuitive inquiry; includes reflexive statements by the analysts and the interview participant herself.

Wheeldon, J., & Ahlberg, M. A. (2012). *Visualizing social science research: Maps, methods, and meaning*. Thousand Oaks, CA: Sage. Overview of quantitative, qualitative, and mixed methods research and how diagrams (e.g., concept maps and mind maps) can be employed during all phases of the research project.

Wolcott, H. F. (1994). *Transforming qualitative data: Description, analysis, and interpretation*. Thousand Oaks, CA: Sage. Anthology of Wolcott's work, with accompanying narrative on three levels of qualitative data analysis.

## TECHNOLOGY AND CAQDAS (COMPUTER ASSISTED QUALITATIVE DATA ANALYSIS SOFTWARE)

---

Altheide, D. L., & Schneider, C. J. (2013). *Qualitative media analysis* (2nd ed.). Thousand Oaks, CA: Sage. Reviews search, collection, and analysis strategies for media documents from television broadcasts, the Internet, social media, and other sources.

Bazeley, P., & Jackson, K. (2013). *Qualitative data analysis with NVivo* (2nd ed.). London: Sage. Reference guide to computer-assisted qualitative data analysis with the program software NVivo.

Berger, A. A. (2019). *Media analysis techniques* (6th ed.). Thousand Oaks, CA: Sage. Paradigms for media analysis of television programs, films, print advertisements, and popular technology (e.g., mobile phones, the Internet).

Friese, S. (2014). *Qualitative data analysis with ATLAS.ti* (2nd ed.). London: Sage. Detailed technical manual for the functions of ATLAS.ti software; focuses primarily on program features.

Gaiser, T. J., & Schreiner, A. E. (2009). *A guide to conducting online research*. London: Sage. Overview of electronic methods of data gathering through e-mail, websites, social networking sites, and so on.

Gibbs, G. R. (2002). *Qualitative data analysis: Explorations with NVivo*. Berkshire, UK: Open University Press. The version of NVivo demonstrated in this book is outdated, but there is still an excellent overview of data-analytic strategies with the software.

Hahn, C. (2008). *Doing qualitative research using your computer: A practical guide*. London: Sage. Step-by-step instructions for using Microsoft Word, Excel, and Access for qualitative data management and coding.

Haw, K., & Hadfield, M. (2011). *Video in social science research: Functions and forms*. London: Routledge. Reference for theoretical applications of video; contains excellent guidelines for video production by young people as a form of participatory research.

Heath, C., Hindmarsh, J., & Luff, P. (2010). *Video in qualitative research: Analysing social interaction in everyday life*. London: Sage. Focuses on microanalysis of video data fragments; shows transcription models for talk and action; excellent guidelines for working with video cameras in the field.

Ignatow, G., & Mihalcea, R. (2017). *Text mining: A guidebook for the social sciences*. Thousand Oaks, CA: Sage. Though text mining is a strategy for software engineers, the book offers qualitative researchers insider knowledge on how text is analyzed from algorithmic perspectives.

Kozinets, R. V. (2015). *Netnography: Redefined* (2nd ed.). London: Sage. Exceptionally well-detailed guide to online ethnographic research; includes excellent considerations for entrée, data collection, and ethical/legal matters.

Makagon, D., & Neumann, M. (2009). *Recording culture: Audio documentary and the ethnographic experience*. Thousand Oaks, CA: Sage. Methods for creating audio documentation of field work, including soundscapes, interviews, citizen journals, and so on.

Paulus, T., Lester, J. N., & Dempster, P. G. (2014). *Digital tools for qualitative research*. London: Sage. Excellent discussion of how digital tools (Internet, media, software, hardware) can be used for data collection and analysis.

Salmons, J. (2016). *Doing qualitative research online*. London: Sage. Excellent manual on collecting/mining data from Internet sources.

Shrum, W., & Scott, G. (2017). *Video ethnography in practice: Planning, shooting, and editing for social analysis*. Thousand Oaks, CA: Sage. Technical and procedural recommendations for digital video equipment and its use in field work and post-production.

Silver, C., & Lewins, A. (2014). *Using software in qualitative research: A step-by-step guide* (2nd ed.). London: Sage. Critically compares and illustrates the basic procedures for three CAQDAS programs: ATLAS.ti, MAXQDA, and NVivo; excellent introductory survey and accompanying reference manual.

Woolf, N. H., & Silver, C. (2018). *Qualitative analysis using ATLAS.ti: The five level QDA method*. New York: Routledge. Explains a branded approach to qualitative analysis, followed by its integration with ATLAS.ti analytic software.

## DATA DISPLAY

---

Evergreen, S. D. H. (2017). *Effective data visualization: The right chart for the right data*. Thousand Oaks, CA: Sage. Offers well-designed templates and ideas for quantitative and qualitative data display in presentations and reports.

Evergreen, S. D. H. (2018). *Presenting data effectively: Communicating your findings for maximum impact* (2nd ed.). Thousand Oaks, CA: Sage. Superior, full color resource on the design principles for visual display of graphics, text, statistics, and so on in presentations and reports.

## THEORY DEVELOPMENT AND APPLICATIONS

---

Alvesson, M., & Kärreman, D. (2011). *Qualitative research and theory development: Mystery as method*. London: Sage. Approach to theory development through problematizing the data and resolving “break-downs” in patterns and field work observations.

Jackson, A. Y., & Mazzei, L. A. (2012). *Thinking with theory in qualitative research: Viewing data across multiple perspectives*. New York: Routledge. Approaches data analysis through theoretical lenses rather than codification; applies the principles of theorists such as Derrida, Foucault, and Butler to an interview data set from female professors.

Koro-Ljungberg, M. (2016). *Reconceptualizing qualitative research: Methodologies without methodology*. Thousand Oaks, CA: Sage. Provocative, polyvocal reader on challenges to the philosophical assumptions of inquiry and conventional thought and practices.

Maxwell, J. (2012). *A realist approach for qualitative research*. Thousand Oaks, CA: Sage. Approaches about realist ontology toward ethnographic inquiry; excellent discussions on causation and research design.

Ravitch, S. M., & Riggan, M. (2017). *Reason and rigor: How conceptual frameworks guide research* (2nd ed.). Thousand Oaks, CA: Sage. Explanation with examples of how a conceptual framework functions as a through-line during all phases and stages of the research process, from design to data analysis and from fieldwork to write-up.

Tavory, I., & Timmermans, S. (2014). *Abductive analysis: Theorizing qualitative research*. Chicago: University of Chicago Press. An intriguing discussion of the analytic heuristic and how it serves social science analysis.

## QUALITATIVE METASYNTHESIS

---

Finfgeld-Connett, D. (2018). *A guide to qualitative meta-synthesis*. New York: Routledge. An elegant overview of meta-synthesis principles with three complete examples of the author's analytic work in the field of domestic violence.

Hannes, K., & Lockwood, C. (Eds.). (2012). *Synthesizing qualitative research: Choosing the right approach*. Hoboken, NJ: Wiley-Blackwell. Chapter collection of various approaches to synthesis with a disciplinary focus on studies in health care and medicine.

Major, C. H., & Savin-Baden, M. (2010). *An introduction to qualitative research synthesis: Managing the information explosion in social science research*. London: Routledge. Excellent theoretical and practical overview of qualitative research synthesis; includes extended examples.

Sandelowski, M., & Barroso, J. (2007). *Handbook for synthesizing qualitative research*. New York: Springer. Detailed methods book on metasummary and metasynthesis of related qualitative studies; for advanced researchers.

Saini, M., & Shlonsky, A. (2012). *Systematic synthesis of qualitative research*. New York: Oxford University Press. Descriptive overview of research study synthesis procedures with a disciplinary focus on social work.

## WRITING QUALITATIVE RESEARCH

---

Allen, M. (2016). *Essentials of publishing qualitative research*. Walnut Creek, CA: Left Coast Press. Superior insider's guide from a publisher on the development and marketing of articles, book chapters, and book manuscripts in academic fields.

Belcher, W. L. (2009). *Writing your journal article in 12 weeks: A guide to academic publishing success*. Thousand Oaks, CA: Sage. Step-by-step and detailed procedures for revising drafts of papers for publication submission.

Booth, W. C., Colomb, G. G., Williams, J. M., Bizup, J., & Fitzgerald, W. T. (2016). *The craft of research* (4th ed.). Chicago: University of Chicago Press. A handbook of basics in logic, argumentation, writing, outlining, revising, and crafting the research report.

Goodall, H. L., Jr. (2008). *Writing qualitative inquiry: Self, stories, and academic life*. Walnut Creek, CA: Left Coast Press. Overview of writing and writing for the profession (journals, books, in the academy, etc.).



Higgs, J., Horsfall, D., & Grace, S. (Eds.). (2009). *Writing qualitative research on practice*. Rotterdam: Sense. Chapter collection of writing up research; includes excellent chapters on question development; argument construction; and genres (narrative inquiry, arts-based research, etc.).

Holliday, A. (2016). *Doing & writing qualitative research* (3rd ed.). London: Sage. Guidance for the beginning researcher's scholarly composition about theory, methods, data, and analysis.

Miller, A. B. (2009). *Finish your dissertation once and for all! How to overcome psychological barriers, get results, and move on with your life*. Washington, DC: American Psychological Association. Focuses on the cognitive/emotional barriers of progress and completion, plus the practical matters of timelines, project management, and writing.

Saldaña, J. (2018). *Writing qualitatively: The selected works of Johnny Saldaña*. London: Routledge. Anthology of the writer's scholarly articles, book chapters, keynote addresses, and arts-based research with introductory and accompanying commentary on the genres, elements and styles of research write-ups.

van Maanen, J. (2011). *Tales of the field* (2nd ed.). Chicago: University of Chicago Press. Contemporary classic on structuring and writing ethnography in various story forms (realistic, confessional, impressionist, etc.).

Wolcott, H. F. (2009). *Writing up qualitative research* (3rd ed.). Thousand Oaks, CA: Sage. Excellent monograph on writing reports clearly and briefly from the first draft to publication.

Woods, P. (2006). *Successful writing for qualitative researchers* (2nd ed.). London: Routledge. Offers specific strategies for writing up final reports; especially good with transitioning from data analysis to reporting; includes numerous examples.

## ONLINE RESOURCES

---

*Forum: Qualitative Social Research*. The multilingual (English, German, Spanish) peer-reviewed e-journal includes articles, interviews with leading figures in the field, commentary, and book reviews: [qualitative-research.net/index.php/fqs](http://qualitative-research.net/index.php/fqs)

*Methodspace*. Hosted by Sage Publications; a community networking site for researchers from various social science disciplines; members can join interest groups such as Qualitative Inquiry, Narrative Research, and Performative Social Science: [methodspace.com](http://methodspace.com)

*Pacific Standard*. A print and online publication of the Miller-McCune Center for Research, Media and Public Policy; includes articles ranging from health to culture, bringing research to a general readership: [psmag.com](http://psmag.com)

*ResearchTalk*. An organization that conducts intensive workshops and camps in the United States throughout the year on various topics in qualitative research: [researchtalk.com](http://researchtalk.com)

*Sage Research Methods*. An online subscription platform of Sage Publications that includes access to books and book chapters, videos, case study profiles, and downloadable data: [methods.sagepub.com](http://methods.sagepub.com)

*The Qualitative Report*. Hosted by Nova Southeastern University; an online journal with a weekly newsletter featuring recent publication links; the site also includes an extensive list of Internet addresses of other organizations devoted to qualitative research: [nsuworks.nova.edu/tqr/](http://nsuworks.nova.edu/tqr/)
